# Hydrophobicity in clearwing butterflies and moths: impact of scale micro and nanostructure, and trade-off with optical transparency

Doris Gomez<sup>1\*</sup>, Jonathan Pairraire<sup>2</sup>, Charline Pinna<sup>3</sup>, Monica Arias<sup>1</sup>, Céline Houssin<sup>3</sup>, Jérôme Barbut<sup>3</sup>, Serge Berthier<sup>2</sup>, Christine Andraud<sup>4</sup>, Thierry Ondarçuhu<sup>5</sup>, Marianne Elias<sup>3</sup>

<sup>1</sup> CEFÉ, CNRS, Univ Montpellier, EPHE, IRD, Montpellier, France, 34090

<sup>2</sup> INSP, Sorbonne University, CNRS, Paris, France, 75005

<sup>3</sup> Institut de Systématique, Evolution, Biodiversité (ISYEB), CNRS, Muséum national d'Histoire naturelle, Sorbonne Université, EPHE, Université des Antilles, France, 75005

<sup>4</sup> CRC, MNHN, Paris, France, 75005

<sup>5</sup> IMFT, Univ. Toulouse, CNRS, Toulouse, France, 31400

\*Doris Gomez

**Email:** [doris.gomez@cefe.cnrs.fr](mailto:doris.gomez@cefe.cnrs.fr)

**Author Contributions:** DG, ME, CA and SB designed the study, DG, ME, CA, JP, and CP defined the protocol, JB, ME, and DG selected the specimens, DG, JP and CH took the structure, CA, and optical measurements, DG, TO, and MA analyzed the data, and all authors contributed to manuscript writing.

**Competing Interest Statement:** No competing interests.

**Classification:** major: Physics and Evolution; minor: Ecology

**Keywords:** Lepidoptera; transparency; trade-off; multiscale roughness; hydrophobicity

**This PDF file includes:**

Main Text

Figures 1 to 8

1 **Abstract (245<=250 words, up to three non-numerical references)**

2 In opaque butterflies and moths, scales ensure vital functions like camouflage, thermoregulation, and  
3 hydrophobicity. Wing transparency in some species – achieved via modified or absent scales – raises  
4 the question of whether hydrophobicity can be maintained and of its dependence on scale microstructural  
5 (scale presence, morphology, insertion angle, and coloration) and nanostructural (ridge spacing and  
6 width) features. To address these questions, we assessed hydrophobicity in 23 clearwing species  
7 differing in scale micro and nanostructures by measuring static contact angle (CA) of water droplets in the  
8 opaque and transparent patches of the same individuals at different stages of evaporation. We related  
9 these measures to wing structures (macro, micro, and nano) and compared them to predictions from  
10 Cassie-Baxter and Wenzel models. We found that overall, transparency is costly for hydrophobicity and  
11 this cost depends on scale microstructural features: transparent patches are less hydrophobic and lose  
12 more hydrophobicity with water evaporation than opaque patches. This loss is attenuated for higher  
13 scale densities, coloured scales (for erect scales), and when combining two types of scales (piliform and  
14 lamellar). Nude membranes show lowest hydrophobicity. Best models are Cassie-Baxter models that  
15 include scale microstructures for erect scales, and scale micro and nanostructures for flat scales. All  
16 findings are consistent with the physics of hydrophobicity, especially on multiscale roughness. Finally,  
17 wing hydrophobicity negatively relates to optical transparency. Moreover, tropical species have more  
18 hydrophobic transparent patches but similarly hydrophobic opaque patches compared to temperate  
19 species. Overall, diverse microstructures are likely functional compromises between multiple  
20 requirements.

21

22

23

24 **Significance Statement (=119, >50 and <=120, no references)**

25 Water repellency is vital for terrestrial organisms. Yet, how microstructural diversity may impact  
26 hydrophobicity is unknown. Bridging the gap between biology and physics, we exploit the microstructural  
27 diversity found in clearwing butterflies and moths to assess its impact on hydrophobicity, and its  
28 ecological relevance. Within a physical framework, we bring experimental and modelling evidence for a  
29 major role of microstructures (scale morphology, insertion angle, coloration) and multiscale roughness  
30 in determining wing hydrophobicity, with a role of nanostructures restricted to flat scales and nude  
31 membrane. For the first time, we evidence some costs for transparency, and a trade-off between optics  
32 and hydrophobicity. Beyond novel biological results, this study gives new sources of bioinspiration for  
33 applied research on transparent materials in physics.

34

35 **Main Text (<8000 words)**

36

37 **Introduction**

38

39 Hydrophobicity is essential for terrestrial organisms. As predicted by physics (1) and illustrated in plants  
40 (2), a key parameter for hydrophobicity is surface texture or roughness. A water droplet sitting on a  
41 textured hydrophobic surface can exhibit two different wetting states. First, in the Cassie-Baxter state  
42 (Figure 1, series a), the water droplet sits on top of the texture, with trapped air underneath and cavities  
43 filled with air (composite state: under the drop, water can be in contact with solid or air), and  
44 hydrophobicity is at a maximum. If this state is thermodynamically unstable, the water droplet may  
45 undergo the so-called Cassie-Baxter to Wenzel transition, in which water penetrates the air-filled cavities  
46 by capillarity. In the Wenzel wetting state (Figure 1 series b), the water droplet fully fills all the cavities  
47 of the textured surface and adheres to the surface (non-composite state: under the drop, water is in  
48 contact with solid only and no longer with air), decreasing the surface energy; hydrophobicity is then lost  
49 (3). Compared to the Wenzel state, the Cassie-Baxter state is of high biological interest as it offers an  
50 incomplete water-surface contact and a weak water adhesion. Maintaining a stable Cassie-Baxter state  
51 is crucial to maintain high hydrophobicity under harsh environmental conditions, rainfall for instance.  
52 Roughness at nanoscale – the parameter most studied to date in animals and plants - increases  
53 hydrophobicity, as shown in cicadids and dragonflies (4–6). Yet, multiscale roughness –at nano and  
54 micro scale – is even more efficient: it increases hydrophobicity and its thermodynamic stability (in  
55 modelling studies 7, 8, illustrated in the Lotus (so-called 'Lotus effect') and other plants in 9) and reduces  
56 water adhesion (7). Increasing thermodynamic stability allows maintaining hydrophobicity with water  
57 droplets of various sizes (dew, fog, rain) and increases anti-fogging properties, i. e. the resistance to  
58 tiny water droplets condensing on the surface. While the role of nanostructures in hydrophobicity has  
59 been extensively documented (e.g. 10, 11), the role of microstructures shape in determining  
60 hydrophobic properties has been limited to simple geometries (cones in 12, cylinders in 13, 14) and  
61 remains poorly investigated from an empirical perspective. The only existing empirical studies with such  
62 an approach either focus on one type of micro-architecture (6, 15) thereby excluding microstructural  
63 influence, or they describe variation in hydrophobicity between various micro-architectures but without  
64 invoking explanations (16).

65 Lepidoptera (from the ancient Greek λεπτίς: scale and πτερόν: wing) – butterflies and moths –  
66 offer an outstanding group to investigate this question. They are characterized by wings entirely covered  
67 with flat and coloured lamellar scales (17). Through their pigmentation and structure, scales are involved  
68 in multiple functions such as antipredator defences (e. g. camouflage, deflection, mimicry in 18, 19),  
69 communication (20), thermoregulation (17, 21–23), or flight enhancement (24, 25). They also confer  
70 superhydrophobic properties to the wing, resulting in water repellency and self-cleaning (26, 27).  
71 Superhydrophobicity *sensu lato* is defined by water droplets making high contact angles (>150°) with a  
72 surface. Self-cleaning – superhydrophobicity *stricto sensu* (definition not taken here) – adds to this  
73 condition a weak water adhesion, estimated by a minimal tilt from the horizontal plane needed for water  
74 droplets to roll-off (roll-off angle of a few degrees) or a minimal hysteresis (difference between advancing

75 and receding contact angles). Superhydrophobicity is thus a *sine qua non* condition for water repellency  
76 and self-cleaning. Opaque butterflies and moths typically have self-cleaning wings, as attested by small  
77 roll-off angles (15, 28). Scarce relevant studies suggest that wing hydrophobicity may depend on wing  
78 microstructure (presence and type of scale in 26, scale type and insertion angle in 29), and on wing  
79 macrostructure: species with longer wings (4), or larger ratio of wing area to body mass (26) show higher  
80 hydrophobicity and wing shape was invoked to explain natural variations in hydrophobicity (4).

81 While the vast majority of Lepidoptera species has opaque wings, some species from various  
82 lineages show transparent or translucent wings (30), which reduces their detectability from visually-  
83 hunting predators (31–33). Transparency shows a broad microstructural diversity (i. e. scale diversity,  
84 see examples in Figure 2), the membrane being nude or covered with scales varying in type (piliform, i.  
85 e., hair-like, and/or lamellar), insertion on the membrane (flat or erect), and colouration (coloured or  
86 transparent) (30). All combinations of scale type, insertion, and colouration (i. e., structural strategies  
87 30) can be found in nature (Figure 2), and they differ in their efficiency at transmitting light : the nude  
88 membrane are most efficient while flat coloured scales (lamellar alone or in combination with piliform)  
89 are least efficient (30). Microstructures are complemented by nanostructures: longitudinal ridges on  
90 scales, and nanostructures on the wing membrane, of various shape and density. Membrane  
91 nanostructures reduce reflection levels and increase light transmission (34–37).

92 Because transparency often entails profound modifications of scale dimensions and density  
93 (30), we can suppose that transparency may be potentially costly for hydrophobicity, for both water  
94 repellency and self-cleaning. These functions are vital for butterflies and moths: water repellency is  
95 crucial for flight and for preventing wings from sticking together, especially in tropical rainforest species  
96 with daily rain and high humidity. Likewise, self-cleaning helps removing dust contamination that impairs  
97 flight (26). Among the lepidopteran species investigated so far for hydrophobicity (15, 26, 27, 29, 38),  
98 only three clearwing butterfly species have been included: *Parantica sita* (with lamellar titled scales) and  
99 *Parnassius glacialis* (with flat lamellar scales), with high or moderate hydrophobicity respectively (15,  
100 29), and *Greta oto* (with piliform scales) with one of the lowest hydrophobicity values found in butterflies  
101 (27). Scarce data suggest that a greater reduction in scale dimensions or coverage on the wing  
102 membrane may entail higher costs in terms of hydrophobicity. However, large-scale comparative studies  
103 are currently lacking.

104 To fill that gap in our knowledge, here we explore to what extent anti-wetting ability is influenced by  
105 micro and nanostructure in species that largely differ in their wing microstructure, by selecting a subset  
106 of 23 species (Figure 3) from a broad study of 123 clearwing Lepidoptera species (30). In these species,  
107 we explored the links between structure, hydrophobicity and optics while controlling for phylogenetic  
108 relatedness between species. First, we explored the relationships between hydrophobicity and wing  
109 structure, at macro-, micro- and nano-structural level: (i) we measured the contact angle (CA) made by  
110 water droplets of various sizes on the wing (ii) We then quantified wing macro-, micro-, and nano-  
111 structures, and related them to hydrophobicity. (iii) Using a modelling perspective, we ran various  
112 Cassie-Baxter and Wenzel models differing by their assumptions and compared the predicted to the  
113 observed CA values to assess the relative importance of microstructure and nanostructures in  
114 determining the observed hydrophobicity. Second, to identify the selective pressures acting on

115 hydrophobicity, we tested whether hydrophobicity and light transmission showed potential trade-off or  
116 synergy. If microstructures play a dominant role in conferring hydrophobicity, species most efficient at  
117 transmitting light – which lack scales or have highly modified scales in low coverage on the wing surface  
118 – are expected be less efficient at repelling water. Third, to identify whether hydrophobicity is influenced  
119 by environmental conditions, we tested the links between habitat latitude and hydrophobicity: if repelling  
120 water is more important in the tropics where rain and humidity are inescapable, tropical species are  
121 expected to show higher hydrophobicity than temperate species.

122

## 123 **Results & Discussion**

124

125 We measured the contact angle of water droplets and wing surface in the transparent and opaque zones  
126 of the forewing of three museum specimens per species, and we monitored contact angle at three times,  
127 as water evaporated and droplet size decreased (Figures 2 and S1). We here considered hydrophobicity  
128 as a proxy for self-cleaning ability. Indeed, although we could not quantify water droplet roll-off angles  
129 precisely with our set-up, we observed that water droplets rolled off extremely fast from the wings when  
130 not perfectly horizontal (DG, ME, JP, and CH pers. obs), which made our measurements particularly  
131 time-consuming. This suggested small roll-off angles and weak water adhesion. Small roll-off angles  
132 are commonly found in opaque butterflies (15, 28) and in *Parantica sita* and *Parnassius glacialis*, the  
133 two clearwing butterfly species studied to date (29).

134

135 We observed a general decrease in hydrophobicity with water evaporation in the opaque zone  
136 and in the transparent zone (Figure 4A). Such a decrease is commonly observed in hydrophobic human-  
137 made surfaces (14, 39, 40) and in natural surfaces, as in the transparent-winged damselfly *Ischnura*  
138 *heterosticta* (3). It is interpreted as a loss of self-cleaning ability when contact angle values get below  
139 the hydrophilicity threshold (3). Beyond this general trend, two results showed that transparency entails  
140 potential costs in terms of water repellency and self-cleaning ability. First, the transparent zone showed  
141 lower hydrophobicity than the opaque zone of the same wing, whatever the size of the water droplet  
142 considered (Figure 4A, zone effect in Table S1, see Figure S2 for distribution of hydrophobicity levels).  
143 Second, we observed a stronger decrease in hydrophobicity with water evaporation in the transparent  
144 than in the opaque zone of the same wing (time x zone effect in Table S1, Figure 4A).

145

### 146 **Variation in hydrophobicity and relation to wing macrostructure**

147 Relationships between hydrophobicity and wing macrostructure were surprising, probably due to the  
148 taxonomic level investigated. Contrary to Byun et al.'s (4) finding that contact angle positively correlated  
149 to wing length (24 species, 10 insect orders), CA as variable to explain, wing length as factor,  
150 estimate= $1.12 \pm 0.38$ ,  $t=2.93$ ,  $p=0.008$ ), we found no relationship between hydrophobicity and wing  
151 length (Table S1). Wing shape was much more diverse in Byun et al.'s dataset (LWratio: min=1.2,  
152 mean=3.6, max=9.3) than in ours (23 species, 1 insect order), LWratio: min=1.8, mean=2.2, max=3.2)  
153 When restricting their dataset to our maximal value for LWratio, the effect of wing length was no longer

154 significant in Byun's dataset ( $n=13$ , wing length estimate= $-23.48 \pm 13.42$ ,  $t=-1.74$ ,  $p=0.13$ ) and the null  
155 model performed best.

156 Contrary to Wagner et al.'s (26) finding that hydrophobicity positively correlated to the ratio of  
157 wing area to body mass (38 species (14 insect orders, CA as variable to explain, ratio of wing area to  
158 body mass as factor, estimate= $0.75 \pm 0.25$ ,  $t=2.95$ ,  $p=0.007$ ), we found an important negative correlation  
159 (Table S1, WingArea / BodyVolume effect, only important when correcting for phylogeny, Figure 4C).  
160 When restricting Wagner et al's dataset to insects without elytra but with a microstructured membrane  
161 (Odonata, Ephemeroptera, Lepidoptera, some Planipennia), Wagner et al.'s positive relationship was  
162 no longer important ( $n=21$  species (4 insect orders), wing area to body mass estimate= $0.01 \pm 0.08$ ,  $t=-$   
163  $0.14$ ,  $p=0.89$ ) and the null model performed best.

164 Comparing our results to previous findings show that relationships with macrostructure seems  
165 dependent on the taxonomic scale and homogeneity in structure. Contrary to our expectation, species  
166 with more elongated wings (higher FW ratio) had a lower hydrophobicity (Figure 4C). Water droplets  
167 exert higher moment force when further away from the butterfly body and should select for higher  
168 hydrophobicity; yet, more elongated wings may already show higher elasticity that may already ensure  
169 rapid droplet roll-off through movement, and offset the need for a higher hydrophobicity. Finally, we  
170 found that species with more elongated wings or with shorter wings exhibited a greater loss of  
171 hydrophobicity with evaporation.

172

### 173 **Variation in hydrophobicity and relation to wing microstructure**

174 We performed classic mixed models and Bayesian models, the latter controlling for species phylogenetic  
175 relatedness, to test to what extent hydrophobicity depends on wing microstructure – namely scale  
176 presence, type (piliform and/or lamellar), insertion (erect or flat on the wing membrane), coloration  
177 (transparent or coloured), and density in both the transparent and the opaque zones – and wing scale  
178 nanostructures – namely the width and spacing of longitudinal ridges that were present on all scales.  
179 Comparing models controlling or not for phylogeny helped us purge our results from spurious  
180 correlations arising from phylogenetic ancestry.

181 The influence of wing microstructure on hydrophobicity was pervasive in our results (Figure 5):  
182 (i) we found a higher interspecific variance in contact angle values in the transparent than in the opaque  
183 zone (Figure 4A, Fligner-Killeen tests with all times together  $\chi^2=79.48$ ,  $p<0.001$  or separated at T1:  
184  $\chi^2=49.57$ ,  $p<0.001$ ; T2:  $\chi^2=29.24$ ,  $p<0.001$ ; T3  $\chi^2=26.47$ ,  $p<0.001$ ), maybe in relation to the higher  
185 interspecific microstructural diversity of the transparent zone. (ii) The nude membrane (N) yielded a  
186 lower hydrophobicity but a similar decrease in hydrophobicity compared to the structural strategies that  
187 involved scales (Table S2, scale presence effect in Table S3a, Figure 5). (iii) Combining two types of  
188 scales (piliform and lamellar) yielded comparable levels of hydrophobicity, but a lower decrease in  
189 hydrophobicity with evaporation than having only one type of scales only (Table S2, Scale Nb ( $2>1$ ) x  
190 Time interaction in Table S3b, Figure 5). (iv) The decrease in hydrophobicity with evaporation was lower  
191 for erect coloured scales than for erect transparent scales (Table S2, Colour EC>ET x Time interaction  
192 in Table S3c, Figure 5). (v) The decrease in hydrophobicity with water evaporation was attenuated for  
193 denser scales (Table S2, time x density interaction in Table S3c, Figure 4B). This attenuation by density

194 was stronger in the transparent zone than in the opaque zone (Table S2, time x density x zone  
195 interaction in Table S3a, S3b, S3d, Figure 4B), and for erect scales (Table S2, time x density interaction  
196 in Table S3c). (vi) For flat lamellar scales, the decrease in hydrophobicity with evaporation was  
197 attenuated when scales were arranged in a higher number of layers, be they in the transparent or in the  
198 opaque zone (Table S2, time x nb layers interaction in Table S3d). (vii) Finally, scale nanostructures did  
199 not explain an important part of the variation in hydrophobicity (scale ridge ratio never retained in the  
200 best models). Because erect geometries (involving piliform and/or lamellar scales: PLE, PE, LE) appear  
201 to behave differently in reaction to water than flat geometries, we analysed scale dimensions and  
202 spacing by performing classic mixed models and Bayesian analyses on the broad dataset of 123 species  
203 used by Gomez et al. (30) to get more representative trends. Compared to flat scales, erect scales were  
204 shortened when one type of scale was involved, especially in lamellar scales (Figure S3). When both  
205 present, piliform and lamellar scales were in similar densities, close in space, and piliform scales were  
206 2.6 times longer than lamellar scales, creating a multi-hierarchical roughness at microscopic scales (see  
207 SI for supplementary results, Table S4, Figure S4).

208 For modelling, we first assigned water droplets at T1 to a Cassie-Baxter regime when droplets  
209 showed a high contact angle after evaporation ( $CA \geq 120^\circ$  at T3; results remained the same when shifting  
210 the threshold to  $110^\circ$ ). We tested Cassie-Baxter models with microstructures alone (scale dimensions,  
211 insertion, and density) or with scale microstructures and nanostructures (ridge-ratio) to assess their  
212 relative importance in determining hydrophobicity observed at T1, selecting as best the model that  
213 minimized the difference between predictions and observations, for each structural strategy separately  
214 (SI, Figure S5 for model details, Figure S6 for best model selection). The best model included only  
215 microstructures for all erect strategies (with piliform and/or lamellar scales PE, LE, PLE, with a mean  
216 difference between observations and predictions of  $19^\circ$ ,  $14^\circ$ , and  $7^\circ$  respectively) and for flat lamellar  
217 scales in low densities (not fully covering the wing membrane, with a mean difference between  
218 observations and predictions of  $20^\circ$  and  $22^\circ$  for the transparent and the opaque zone respectively). This  
219 is consistent with the fact that in these cases water is in contact with scale contour/edge which does not  
220 exhibit any nanostructures. For strategies involving erect piliform scales (PE, PLE), the model with  
221 bending piliform scales outperformed the model with fully erect piliform scales. For flat piliform scales  
222 (PF) and for flat lamellar scales (LF) in high densities (fully covering the membrane), the best model  
223 included microstructures and scale nanostructures (with a mean difference between observations and  
224 predictions of  $12^\circ$  for PF,  $20^\circ$  and  $22^\circ$  for the transparent and the opaque zone respectively). In this  
225 case, the scale upper side is in contact with water and both types of structures come into play. In general,  
226 predictions were rather close to observations with no systematic bias towards under or over-estimation  
227 of  $\phi_s$ , the fraction of the droplet contact area where water is in contact with the solid (Figure 6).

228 For the water droplets not categorized as in a Cassie-Baxter state, we tested whether a Wenzel  
229 model with microstructures only could predict the observed values at T1 (Figure S7). We could not test  
230 a Wenzel model with micro and nanostructures, as it required to precisely characterize scale  
231 nanogroove height and membrane nanostructures, which was not possible on museum specimens.  
232 Predictions of Wenzel models were far below observations (Figure S8). This is not surprising since the  
233 validity of Wenzel model – as currently formulated – is widely questioned in the literature (41 and

234 references therein). This is especially true for our dataset given that most microstructures only weakly  
235 increase the roughness parameter  $r$  (see materials and methods) while providing strong pinning sites  
236 for the contact line and thus significantly increasing the contact angle measured at T1.

237         Going back to the physical theory behind hydrophobicity, several studies have shown that a  
238 single-level structure does not necessarily guarantee a low water adhesion, even in the Cassie-Baxter  
239 state (see references in 7). Introducing higher levels of hierarchy increases the robustness of a surface  
240 hydrophobicity (8): it stabilizes the Cassie-Baxter state by dramatically decreasing the contact area  
241 fraction (ratio of contact area to the total surface area of the structure) and thus the adhesion force of  
242 water droplets, and by enlarging the energy difference between the Cassie-Baxter and the Wenzel  
243 states. Hierarchical structures can be frequently found in plants and in animals. For instance, in the  
244 water strider *Gerris remigis*, leg water resistance is due to the hierarchical structures of nano-grooved  
245 microsetae, which prevents striders from being drowned under heavy rainfall (42). This likely explains  
246 why, in our study, the combination of erect piliform scales and lamellar scales yields a lower loss of  
247 hydrophobicity with evaporation than piliform or lamellar scales alone. Such geometries have a 3-level  
248 roughness: (1) erect piliform scales bending over lamellar scales (piliform scales are 2.6 times longer  
249 than lamellar scales and first in contact with water), (2) erect lamellar scales tightly associated in space  
250 to piliform scales (similar density and close spacing), and (3) nanostructures on scales and on the wing  
251 membrane. Hydrophobicity likely results from the combination of the complex geometry of erect  
252 microstructures (which considerably reduces the proportion of the total surface in contact with water),  
253 and the gain in mechanical resistance (gain in elasticity and resistance against breakage) of piliform  
254 scales when bending against lamellar scales. The importance of elasticity of bending hair-like  
255 microstructures has been found in several studies. In the Lady's mantle plant (*Alchemilla vulgaris*), hairs  
256 are hydrophilic when measured individually, but they bend and coalesce into bundles when in contact  
257 with water droplets; their elasticity results in a repulsive interaction between the droplet and the plant  
258 surface, which maintains hydrophobicity (CA above 90°) (43). Likewise, in *Nasutitermes* termites, large  
259 bending hairs and small micrasters (micraster wavelength was around 11,7  $\mu\text{m}$  according to our  
260 measurements taken on Figure 3C from 41) enable hydrophobicity (CA above 90°) in both rain and mist  
261 conditions (44).

262         Increasing the density of microstructures does not significantly change hydrophobicity, but leads  
263 to a lower loss of hydrophobicity with water evaporation, i. e., to a higher resistance to tiny water droplets.  
264 This can be seen for all structural strategies (effect time  $\times$  density) and for flat scales organized in layers  
265 (effect time  $\times$  number of layers). This is consistent with the fact that, during droplet evaporation, the  
266 Cassie-Baxter regime is more robust for large microstructure density. Not only scale architecture but  
267 also coloration can contribute to hydrophobicity. Erect scales show a lower loss of hydrophobicity when  
268 pigmented than when transparent. In the transparent zone, coloured scales exhibit colours ranging from  
269 pale yellow to brown and black. They are likely impregnated by melanin pigments, which are known to  
270 be involved – for some biochemical forms – in cuticle sclerotization (hardening) (45). Hence, the  
271 additional hardening conferred by pigments may increase their mechanical resistance to deformation  
272 and may contribute to maintaining hydrophobicity, even when evaporation occurs.



273 We found that scale nanostructures did not contribute significantly to wing hydrophobicity for  
274 most structural strategies, except for flat lamellar scales fully covering the wing membrane and  
275 organized in layers, in the transparent or in the opaque zone, and for flat piliform scales in the  
276 transparent zone (Figure S6). Our results bring novel evidence for a major role of microstructures in  
277 explaining large variations in hydrophobicity when diverse microstructures are considered. The rare  
278 existing studies on the subject suggest a synergetic effect of scale nanostructures and microstructures  
279 on enhancing surface hydrophobicity (experiments on one type of microstructure, namely flat lamellar  
280 scales in opaque butterflies, in (15, 46) or hairs in the wing of the housefly *Musca domestica* (47);  
281 theoretical modelling on one type of microstructure in (48)), or even a major role of nanostructures in  
282 the overall variation (15, 47). Yet, these two analyses only examine one type of microstructure, thereby  
283 potentially underestimating the importance of microstructures when more types of microstructures are  
284 considered. Overlap in scales is assumed to help anisotropy in hydrophobicity (49). Here, we find that  
285 it attenuates the loss of hydrophobicity with water evaporation, thereby maintaining self-cleaning ability  
286 more efficiently.

287 Wing mechanical resistance is crucial for flight and geometries that limit protrusion height are  
288 more resistant to breakage and less hydrophobic (50). Several of our results suggest scale height may  
289 be limited: (i) erect piliform scales are likely bending over the membrane as shown by modelling. (ii)  
290 When piliform scales are alone, they have similar height, be they flat or erect, maybe because they bend  
291 easily, which may limit their sensitivity to breakage. (iii) Erect lamellar scales are shortened compared  
292 to flat lamellar scales, which likely increases their resistance to breakage. (iv) Erect transparent lamellar  
293 scales are densely packed, as shown in Gomez et al. (30), which can also increase their mechanical  
294 resistance. Further experiments are needed to elucidate these aspects, and clarify the role of  
295 nanostructures, as not only their presence, but their topography and its randomness have been recently  
296 suggested to play a role in determining antiwetting properties (51).

297

### 298 **Trade-off between hydrophobicity and optical transparency**

299 Using spectrometric measurements of wing direct transmittance, we found a negative relationship  
300 between contact angle and mean transmittance over 300-700 nm (Table S5, Figure 7). A 10% increase  
301 in transmittance resulted in a 4° loss in CA. While this relationship was marginally significant without  
302 controlling for phylogenetic relatedness, whatever the level of analysis (all CA values, mean CA values  
303 per individual, mean CA values per species), it was statistically important (i. e., the 95% credibility  
304 interval did not contain 0) in phylogeny-controlled analyses when considering all measurements or mean  
305 individual values, but less important at species level (90% credibility interval), likely because of weaker  
306 statistical power. In agreement with our prediction that microstructures play a major role in  
307 hydrophobicity, we find a negative relationship between hydrophobicity and transparency, a condition  
308 associated with major modifications in scale shape and density. This trade-off can be seen from the  
309 literature: the nymphalid butterfly *Greta oto* has been shown to exhibit a high transparency resulting  
310 from poorly dense erect piliform scales and efficient antireflective nanostructures (35, 37) but a weak  
311 hydrophobicity (27). Likewise, the trade-off can be seen in the dragonfly *Gynacantha dravida* (which has  
312 micro and nanospikes), in which distal wing parts show higher hydrophobicity but lower transmittance

313 compared to proximal wing parts (52). Finding this trade-off is fully compatible with the fact that some  
314 species with nude membrane show high hydrophobicity: membrane nanostructures are at full play in  
315 species with nude membrane and can potentially efficiently reduce both reflection and water adhesion,  
316 like in the cicada *Aleeta curvica* (53). In species with erect scales, our models show a major role of  
317 microstructures and a negligible role of nanostructures in hydrophobicity. If selection for hydrophobicity  
318 is relaxed on membrane nanostructures in species with erect scales, this may explain why  
319 nanostructures are so diverse in their architecture (type, density), as recently shown in clearwing  
320 Lepidoptera (36).

321

### 322 **Hydrophobicity and latitude**

323 Compared to their temperate counterparts, species living in the tropics had a higher hydrophobicity in  
324 their transparent zone – loss of 10° CA for 10° increase in latitude – but a similar hydrophobicity in their  
325 opaque zone (Table S6, Figure 8) All species showed superhydrophobic opaque patches (intercept  
326 above 150° in Table S6, Figure 8B) and there was no relationship between the proportion of wing area  
327 occupied by transparency and latitude that could have explained the observed variations in CA (model  
328 with proportion of transparency as dependent variable, latitude effect =  $0.08 \pm 0.22$ ,  $t=-0.31$ ,  $p=0.76$ , the  
329 best model was the null model). This result is consistent with the prediction that in tropical climates  
330 where species face more humid conditions, and where rainfall can happen daily, there is a stronger  
331 selective pressure for increased hydrophobicity. While the opaque zone allows maximizing  
332 hydrophobicity in all environmental conditions, the differential in environmental conditions reveals the  
333 costs of transparency. To our knowledge, this is the first evidence for a higher hydrophobicity in more  
334 humid conditions. Scarce relevant studies have explored the link between habitat humidity and species  
335 hydrophobicity: at local geographical scale, all four cicada species studied by (6) show  
336 superhydrophobicity regardless of whether they live in dry or more humid habitats, but annual species  
337 are more hydrophobic than the species that emerges in large swarms every 17 years. Likewise,  
338 Goodwyn et al. (29) suggest that in transparent butterflies hydrophobicity may depend on lifespan and  
339 migration ability. Further studies are needed to elucidate the links between hydrophobicity and species  
340 ecology.

341

342 This study is the first to mix many architectures at microscale and give access to the relative  
343 role of micro and nanostructures at transmitting light and repelling water. It shows that selection likely  
344 acts on multiple features of scales (shape, orientation, coloration, density) in relation to climatic  
345 conditions. Considering more natural geometric complexity in experimental and theoretical studies on  
346 hydrophobicity should open new venues for applied physics and answer open questions like the role of  
347 randomness in nanostructures, shown to improve optical transparency (35) but suggested to impair  
348 hydrophobicity (54, but see 51).

349

350

351

### 352 **Materials and Methods**

353

### 354 **Species selection**

355 Scale type and scale insertion have been suggested to influence hydrophobicity(29); scale coloration,  
356 often involving melanin deposition which increases cuticle hardening in insects (45), could increase  
357 scale stiffness and ability to repel water droplets. Hence, we selected a set of species varying in  
358 structural strategies – scale type (N=nude membrane, P=piliform bifid or monofid scales, L=shape  
359 different than piliform, hereafter called lamellar, or PL=association of piliform and lamellar scales),  
360 insertion (E=erect or F=flat), and colouration (C=coloured or T=transparent) – from the study of 123  
361 species of clearwing Lepidoptera (30). We minimized the phylogenetic relatedness between species  
362 harbouring the same type of structural strategies to increase the power of comparative analyses. We  
363 selected a total of 23 species from 10 families (Figure 1 & 2, list in Table S7), comprising 3 species for  
364 the structural strategies (N, PFC, PEC, LFC, LFT, LEC, LET), 2 species for PLEC and LEC, and 1  
365 species for PLET, as for some species only a limited number of specimens were present in the  
366 collections. For each species, we selected three specimens in good condition either from Paris MNHN  
367 collections or from our own private collections. 54/69 specimens (all species but *Eutresis hypereia*) had  
368 labels with exact collect location that could be tracked down to GPS coordinates.

369

### 370 **Hydrophobicity measurements**

371 For each specimen, we used a purpose-built water-droplet dispenser (a graduated pipette on a holder)  
372 and a Keyence VHX-5000 microscope (equipped with Z20 zoom) to image water droplets on butterfly  
373 wings. As a general procedure, we dropped a series of three 1µl water droplets (volume usually taken  
374 to assess hydrophobicity (3, 29)) at three locations of the transparent and opaque zones of the dorsal  
375 side of a wing. After the water droplet was dropped (time T1), we allowed its volume to be approximately  
376 divided by two (time T2) and by four (time T3) compared to its original volume. Since evaporation kinetics  
377 depended on droplet shape, time intervals elapsed between consecutive photos were not identical from  
378 one species to another. At each time, we took a photo (Figure 1) in which we measured the static contact  
379 angle (Figure S1). Contact angle measurements were first measured on both wings and found highly  
380 repeatable (see detailed methods and results in SI, Table S8). We thus kept the same protocol, but we  
381 measured only the forewing.

382

### 383 **Measurements of wing macro, micro and nanostructure**

384 To characterize wing macrostructure, we took photos of the three specimens of each species using a  
385 camera (D800E Nikon, 60mm lens, annular light). We analysed photos using ImageJ (55). Given the  
386 role of wing length (4), maybe wing shape (4), and ratio of total wing area to body mass (53) on  
387 hydrophobicity and self-cleaning ability, we computed wing length, length-to-width LW ratio and the ratio  
388 of total wing area to body volume, taking the volume as a proxy for mass for dry specimens, and  
389 assuming the body to be a cylinder, for which we measured length (thorax+abdomen) and width. Using  
390 the 'rptR' package (56), we found that all wing macrostructural measurements were repeatable, i.e. that  
391 a specimen was representative of its species for all wing macrostructural variables (Table S8).

392 To characterize wing microstructure (i.e. scale characteristics, presence, type, insertion,  
393 coloration, density), we imaged the dorsal side of forewing transparent and opaque zones using  
394 microscopes (Zeiss Stereo Discovery V20 and Keyence VHX-5000). We did that in one specimen per  
395 species because scale dimensions and density had already been found repeatable at zone by species  
396 level in Gomez et al. (30). Using ImageJ or the Keyence built-in tool, we measured scale density (per  
397 mm<sup>2</sup>), length and width (μm), scale surface (in μm<sup>2</sup>) as the product of length by width, and scale  
398 coverage as the product of scale surface (expressed in mm<sup>2</sup>) by scale density. We counted the number  
399 of different scale types: 0=nude membrane, 1= lamellar scales or piliform scales, 2= combination of  
400 piliform scales and lamellar scales. For flat lamellar scales, we also computed the density of scale top  
401 layer and computed the number of layers as the ratio between density and top layer density.

402 We quantified scale nanostructures – width and spacing (in μm) of longitudinal ridges present  
403 on all scales – on the detailed top-view microscopical images. We computed the ridge-ratio as ridge  
404 width to spacing (SI, Fig S2). Since museum specimens are patrimonial material, we could not damage  
405 or destroy specimens to image membrane nanostructures or scale ridge height.

406

#### 407 **Optical measurements**

408 For one specimen per species, we measured specular transmittance from 300 to 700 nm as in Gomez  
409 et al. (30), using a deuterium-halogen lamp (Avalight DHS), direct optic fibres (FC-UV200-2-1.5 x 100)  
410 and a spectrometer (Avaspec-2048 L, Avantes). Wing samples were placed perpendicular at equal  
411 distance between fibres aligned 5 mm apart (1 mm diameter spot). We took five measurements of the  
412 forewing in various points of the transparent zone. Using Avicol v6 (57), we computed the mean  
413 transmittance over [300-700] nm, which described the level of optical transparency. Optical  
414 measurements had been found highly repeatable at species level in Gomez et al. (30).

415

#### 416 **Comparative analyses**

417 All analyses were conducted using the R environment\_(58). We conducted mixed models not controlling  
418 for phylogeny using the 'nlme' R package (59). We selected the best mixed model using AICc  
419 minimization. We used the formulated model for Bayesian mixed models with MCMC analyses  
420 controlling for phylogeny, using the 'mulTree' R package (60). Bayesian analyses used the maximum  
421 clade credibility (MCC) phylogeny obtained in Gomez et al. (30) and pruned to targeted species.  
422 Comparing classic and Bayesian mixed models allowed us to assess the influence, if any, of phylogeny  
423 on the observed relationships. For Bayesian analyses, we used uninformative priors, an Inverse-Gamma  
424 distribution (shape = 0.001, scale = 0.001) for both random effect and residual variances (61), 2 chains  
425 of 500,000 iterations, burn-in of 10,000, and thinning interval of 300. Fixed effects were considered  
426 statistically important when associated with 95% credibility intervals excluding zero, and less important  
427 (marginally important) when associated with 90% credibility interval excluding zero.

428 Considering all contact angle measurements, we analysed the variation in contact angle with (i)  
429 wing macrostructure descriptors – time, zone, forewing size, surface, LW ratio, the ratio of total wing  
430 area divided by body volume, and relevant two and three-way interactions –; (ii) with wing microstructure  
431 descriptors – time, zone, wing length (to correct for variation in scale dimensions), scale length, width,

432 density, scale type, number of different types, scale insertion, scale colouration, number of layers, ridge-  
433 ratio, and biologically relevant two and three-way interactions. (iii) To characterize spatial geometries,  
434 we analysed scale length against scale insertion for structural strategies with one scale type. For  
435 structural strategies based on both scale types (piliform and lamellar), we analyzed length ratio, density  
436 ratio and spatial association between the two scale types in relation to scale insertion (see SI for details).  
437 (iv) We analyzed the difference between contact angles predicted by various Cassie-Baxter and Wenzel  
438 models (see below) and measured contact angles at T1 to select the best models. (v) We tested for a  
439 potential trade-off between optical transparency and wing hydrophobicity, considering all measurements  
440 of contact angle, individual mean values, or species mean values at T1. (vi) Finally, we tested whether  
441 tropical species were more hydrophobic than temperate species. To do so, we related for each specimen  
442 its average CA value to its latitude to the equator, the proportion of wing area occupied by transparency  
443 and wing length, while taking species as random effect, for the opaque and transparent zone separately.  
444 We also tested whether variation in the proportion of transparency could be explained by the latitude to  
445 the equator.

446

#### 447 **Hydrophobicity modelling**

448 To assess to what extent scale micro- and nanostructure could explain the observed variation in  
449 hydrophobicity, we elaborated Cassie-Baxter model (62), whereby water only wets the top of the surface  
450 and the apparent contact angle observed at equilibrium is  $\theta^*$ .

$$451 \quad \cos \theta^* = \Phi_S \cos \theta_S + \Phi_A \cos \theta_A \dots \dots \dots (\text{Eq 1})$$

452 where  $\Phi_S$  is the fraction of the droplet contact area where water is in contact with the solid, and  $\Phi_A$  is  
453 the fraction of droplet contact area in contact with air, with  $\Phi_S + \Phi_A = 1$ .  $\theta_A = 180^\circ$  (contact angle of  
454 water with air) and the angle  $\theta_S$  (also called Young angle) is the contact angle of water on an ideal  
455 smooth surface of the same material (wing membrane), set to  $95^\circ$ , as in Fang et al (15), a plausible  
456 value given the presence of epicuticular wax on the wing membrane (63), even in clearwing Lepidoptera  
457 (37). This equation is valid for water droplet size largely exceeding surface roughness wavelength (64),  
458 which is the case for  $1\mu\text{l}$  water droplets. Considering flat-topped geometries simplifies Eq1 to:

$$459 \quad \cos \theta^* = \Phi_S \cos \theta_S - (1 - \Phi_S) \dots \dots \dots (\text{Eq 2})$$

460 While  $\Phi_S = 1$  for a nude membrane,  $\Phi_S < 1$  for all the other microstructures (Figure S5 for calculations).  
461 We explored several hypotheses: piliform scales fully erect or bending over a fraction  $pp = 3/5$  of their  
462 length (the value  $3/5$  comes from P/L length ratio = 2.6 found for PLE strategies in Figure S4), an  
463 organization of flat lamellar scales in one layer if in low density, or several layers (NL) when in high  
464 density, models with microstructures only, or with micro and nanostructures. In the latter case, we  
465 considered water droplets contacted scale nanostructures whether flat scales (PF or LF) covered the  
466 wing membrane entirely or not, or only when scales were in high coverage, building a homogeneous  
467 horizontal surface.

468 We also elaborated a Wenzel model (1), whereby water fills all the pores of the surface and the  
469 wetting contact angle is primarily determined by surface roughness  $r$ . The apparent contact angle  $\theta^*$  is  
470 obtained by:

$$471 \quad \cos \theta^* = r \cos \theta_S \dots \dots \dots (\text{Eq 3})$$

472 where  $r$  is the ratio between the total solid surface and the projected surface, and the angle  $\theta_s$  is the  
473 same as previously. We only included microstructures in the model since we had no measurement of  
474 scale ridge height or membrane nanostructures. While  $r=1$  for a nude membrane,  $r$  exceeds 1 for all the  
475 other microstructures (see Figure S7 for calculations).

476  
477

## 478 **Acknowledgments**

479

480 This work was funded by Clearwing ANR project (ANR-16-CE02-0012), HFSP project on transparency  
481 (RGP0014/2016) and a France-Berkeley fund grant (FBF #2015-58). We warmly thank Jacques Pierre  
482 and Rodolphe Rougerie for help with species choice, identification, and data on species ecology, Edgar  
483 Attivissimo for contributing to Keyence imaging, and Thibaud Decaëns, Daniel Herbin, and Claude  
484 Tautel for species selection and identification.

485  
486  
487

## 488 **References**

489

- 490 1. R. N. Wenzel, Resistance of solid surfaces to wetting by water. *Ind. Eng. Chem.* **28**, 988–994  
491 (1936).
- 492 2. W. Barthlott, C. Neinhuis, Purity of the sacred lotus, or escape from contamination in biological  
493 surfaces. *Planta* **202**, 1–8 (1997).
- 494 3. J. Hasan, *et al.*, Spatial Variations and Temporal Metastability of the Self-Cleaning and  
495 Superhydrophobic Properties of Damselfly Wings. *Langmuir* **28**, 17404–17409 (2012).
- 496 4. D. Byun, *et al.*, Wetting Characteristics of Insect Wing Surfaces. *J. Bionic Eng.* **6**, 63–70 (2009).
- 497 5. M. Sun, G. S. Watson, Y. Zheng, J. A. Watson, A. Liang, Wetting properties on nanostructured  
498 surfaces of cicada wings. *J Exp Biol* **212**, 3148–3155 (2009).
- 499 6. J. Oh, *et al.*, Exploring the Role of Habitat on the Wettability of Cicada Wings. *ACS Appl. Mater.*  
500 *Interfaces* **9**, 27173–27184 (2017).
- 501 7. Y. Su, *et al.*, Nano to Micro Structural Hierarchy Is Crucial for Stable Superhydrophobic and  
502 Water-Repellent Surfaces. *Langmuir* **26**, 4984–4989 (2010).
- 503 8. M. S. Bell, A. Shahraz, K. A. Fichthorn, A. Borhan, Effects of Hierarchical Surface Roughness on  
504 Droplet Contact Angle. *Langmuir* **31**, 6752–6762 (2015).
- 505 9. W. Barthlott, M. Mail, C. Neinhuis, Superhydrophobic hierarchically structured surfaces in  
506 biology: evolution, structural principles and biomimetic applications. *Philos. Trans. R. Soc. A-*  
507 *Math. Phys. Eng. Sci.* **374**, 20160191 (2016).

- 508 10. N. A. Patankar, Mimicking the lotus effect: Influence of double roughness structures and  
509 slender pillars. *Langmuir* **20**, 8209–8213 (2004).
- 510 11. F. Porcheron, P. A. Monson, Mean-Field Theory of Liquid Droplets on Roughened Solid  
511 Surfaces: Application to Superhydrophobicity. *Langmuir* **22**, 1595–1601 (2006).
- 512 12. W. Ding, M. Fernandino, C. A. Dorao, Conical micro-structures as a route for achieving super-  
513 repellency in surfaces with intrinsic hydrophobic properties. *Appl. Phys. Lett.* **115**, 053703  
514 (2019).
- 515 13. C. E. Cansoy, H. Y. Erbil, O. Akar, T. Akin, Effect of pattern size and geometry on the use of  
516 Cassie–Baxter equation for superhydrophobic surfaces. *Colloids and Surfaces A:  
517 Physicochemical and Engineering Aspects* **386**, 116–124 (2011).
- 518 14. P. Tsai, R. G. H. Lammertink, M. Wessling, D. Lohse, Evaporation-Triggered Wetting Transition  
519 for Water Droplets upon Hydrophobic Microstructures. *Phys. Rev. Lett.* **104**, 116102 (2010).
- 520 15. Y. Fang, G. Sun, Y. H. Bi, H. Zhi, Multiple-dimensional micro/nano structural models for  
521 hydrophobicity of butterfly wing surfaces and coupling mechanism. *Sci. Bull.* **60**, 256–263  
522 (2015).
- 523 16. A. Sanchez-Monge, J. Rodriguez Arrieta, M. Jimenez-Chavarria, A. Retana-Salazar, Observations  
524 on the Ultrastructure and Hydrophobicity of the Wings of Thirteen Neotropical Families of  
525 Diptera (insecta) with Comments on Their Flight. *Acta Microsc.* **24**, 111–117 (2015).
- 526 17. I. N. Miaoulis, B. D. Heilman, Butterfly thin films serve as solar collectors. *Ann. Entomol. Soc.*  
527 *Am.* **91**, 122–127 (1998).
- 528 18. I. C. Cuthill, *et al.*, Disruptive coloration and background pattern matching. *Nature* **434**, 72–74  
529 (2005).
- 530 19. M. Stevens, C. L. Stubbins, C. J. Hardman, The anti-predator function of “eyespot” on  
531 camouflaged and conspicuous prey. *Behav. Ecol. Sociobiol.* **62**, 1787–1793 (2008).
- 532 20. D. J. Kemp, Female butterflies prefer males bearing bright iridescent ornamentation. *Proc Royal*  
533 *Soc B* **274**, 1043–1047 (2007).
- 534 21. S. Berthier, Thermoregulation and spectral selectivity of the tropical butterfly *Prepona*  
535 *meander*: a remarkable example of temperature auto-regulation. *Appl Phys A-Mater* **80**, 1397–  
536 1400 (2005).
- 537 22. A. Krishna, *et al.*, Infrared optical and thermal properties of microstructures in butterfly wings.  
538 *Proc Natl Acad Sci USA* **117**, 1566–1572 (2020).
- 539 23. C.-C. Tsai, *et al.*, Physical and behavioral adaptations to prevent overheating of the living wings  
540 of butterflies. *Nat Commun* **11**, 551 (2020).
- 541 24. W. Nachtigall, Aerodynamische Messungen am Tragfluegelsystem segeinder Schmetterlinge.  
542 *Journal of Comparative Physiology A* **54**, 210–231 (1967).

- 543 25. N. Slegers, *et al.*, Beneficial aerodynamic effect of wing scales on the climbing flight of  
544 butterflies. *Bioinspir. Biomim.* **12**, 016013 (2017).
- 545 26. T. Wagner, C. Neinhuis, W. Barthlott, Wettability and contaminability of insect wings as a  
546 function of their surface sculptures. *Acta Zoologica* **77**, 213–225 (1996).
- 547 27. N. D. Wanasekara, V. B. Chalivendra, Role of surface roughness on wettability and coefficient of  
548 restitution in butterfly wings. *Soft Matter* **7**, 373–379 (2011).
- 549 28. Y. Fang, *et al.*, “Micro-morphological Models for the Special Wettability of Locust and Moth  
550 Wing” in *Proceedings of the 2017 5th International Conference on Mechatronics, Materials,*  
551 *Chemistry and Computer Engineering (Icmmcce 2017)*, M. Wang, X. Zhou, Eds. (Atlantis Press,  
552 2017), pp. 330–333.
- 553 29. P. Perez Goodwyn, Y. Maezono, N. Hosoda, K. Fujisaki, Waterproof and translucent wings at the  
554 same time: problems and solutions in butterflies. *Naturwissenschaften* **96**, 781–787 (2009).
- 555 30. D. Gomez, *et al.*, Transparency in butterflies and moths: structural diversity, optical properties  
556 and ecological relevance. *Ecological Monographs* (2021)  
557 <https://doi.org/10.1101/2020.05.14.093450> (May 19, 2020).
- 558 31. M. McClure, *et al.*, Why has transparency evolved in aposematic butterflies? Insights from the  
559 largest radiation of aposematic butterflies, the Ithomiini. *Proc Royal Soc B* **286**, 20182769  
560 (2019).
- 561 32. M. Arias, *et al.*, Transparency reduces predator detection in chemically protected clearwing  
562 butterflies. *Funct Ecol* (2019) <https://doi.org/10.1111/1365-2435.13315>.
- 563 33. M. Arias, M. Elias, C. Andraud, S. Berthier, D. Gomez, Transparency improves concealment in  
564 cryptically coloured moths. *J Evol Biol* **33**, 247–252 (2020).
- 565 34. A. Yoshida, M. Motoyama, A. Kosaku, K. Miyamoto, Antireflective nanoprotuberance array in  
566 the transparent wing of a hawkmoth, *Cephonodes hylas*. *Zoological Science* **14**, 737–741 (1997).
- 567 35. R. H. Siddique, G. Gomard, H. Holscher, The role of random nanostructures for the  
568 omnidirectional anti-reflection properties of the glasswing butterfly. *Nature Communications* **6**  
569 (2015).
- 570 36. C. Pinna, *et al.*, Convergence in light transmission properties of transparent wing areas in  
571 clearwing mimetic butterflies. *bioRxiv*, 2020.06.30.180612 (2020).
- 572 37. A. F. Pomerantz, *et al.*, Developmental, cellular, and biochemical basis of transparency in the  
573 glasswing butterfly *Greta oto*. *Journal of Experimental Biology* **accepted**, eb237917 (2021).
- 574 38. Y. M. Zheng, X. F. Gao, L. Jiang, Directional adhesion of superhydrophobic butterfly wings. *Soft*  
575 *Matter* **3**, 178–182 (2007).
- 576 39. G. McHale, S. Aqil, N. J. Shirtcliffe, M. I. Newton, H. Y. Erbil, Analysis of Droplet Evaporation on a  
577 Superhydrophobic Surface. *Langmuir* **21**, 11053–11060 (2005).



- 578 40. M. Reyssat, J. M. Yeomans, D. Quéré, Impalement of fakir drops. *EPL* **81**, 26006 (2007).
- 579 41. D. Quéré, Wetting and Roughness. *Annual Review of Materials Research* **38**, 71–99 (2008).
- 580 42. X. Gao, L. Jiang, Water-repellent legs of water striders: Biophysics. *Nature* **432**, 36–36 (2004).
- 581 43. A. Otten, S. Herminghaus, How Plants Keep Dry: A Physicist’s Point of View. *Langmuir* **20**, 2405–  
582 2408 (2004).
- 583 44. G. S. Watson, B. W. Cribb, J. A. Watson, Contrasting Micro/Nano Architecture on Termite  
584 Wings: Two Divergent Strategies for Optimising Success of Colonisation Flights. *PLOS ONE* **6**,  
585 e24368 (2011).
- 586 45. M. Sugumaran, Complexities of cuticular pigmentation in insects. *Pigment Cell & Melanoma*  
587 *Research* **22**, 523–525 (2009).
- 588 46. S. N. Aideo, D. Mohanta, Unusually diverse surface-wettability features found in the wings of  
589 butterflies across Lepidoptera order and evaluation of generic and vertical gibbosity-based  
590 models. *Phys. Scr.* **96**, 085004 (2021).
- 591 47. Q. Wan, *et al.*, Combination of active behaviors and passive structures contributes to the  
592 cleanliness of housefly wing surfaces: A new insight for the design of cleaning materials. *Colloid*  
593 *Surf. B-Biointerfaces* **180**, 473–480 (2019).
- 594 48. S. H. Sajadinia, F. Sharif, Thermodynamic analysis of the wetting behavior of dual scale  
595 patterned hydrophobic surfaces. *Journal of Colloid and Interface Science* **344**, 575–583 (2010).
- 596 49. D. Bixler, B. Bhushan, Rice- and butterfly-wing effect inspired self-cleaning and low drag  
597 micro/nanopatterned surfaces in water, oil, and air flow. *Nanoscale* **6**, 76–96 (2014).
- 598 50. E. Bittoun, A. Marmur, The Role of Multiscale Roughness in the Lotus Effect: Is It Essential for  
599 Super-Hydrophobicity? *Langmuir* **28**, 13933–13942 (2012).
- 600 51. Y. Li, *et al.*, Biomimetic Random Arrays of Nanopillars and Nanocones with Robust Antiwetting  
601 Characteristics. *J. Phys. Chem. C* **124**, 17095–17102 (2020).
- 602 52. S. N. Aideo, D. Mohanta, Limiting hydrophobic behavior and reflectance response of dragonfly  
603 and damselfly wings. *Applied Surface Science* **387**, 609–616 (2016).
- 604 53. G. S. Watson, S. Myhra, B. W. Cribb, J. A. Watson, Putative functions and functional efficiency of  
605 ordered cuticular nanoarrays on insect wings. *Biophys. J.* **94**, 3352–3360 (2008).
- 606 54. M. Sun, *et al.*, Influence of Cuticle Nanostructuring on the Wetting Behaviour/States on Cicada  
607 Wings. *PLOS ONE* **7**, e35056 (2012).
- 608 55. C. A. Schneider, W. S. Rasband, K. W. Eliceiri, NIH Image to ImageJ: 25 years of image analysis.  
609 *Nat. Methods* **9**, 671–675 (2012).
- 610 56. M. A. Stoffel, S. Nakagawa, H. Schielzeth, rptR: repeatability estimation and variance  
611 decomposition by generalized linear mixed-effects models. *Methods Ecol Evol* **8**, 1639–1644  
612 (2017).

- 613 57. D. Gomez, *AVICOL v6. a program to analyse spectrometric data. Free program available from*  
614 *the author upon request at dodogomez@yahoo.fr or by download from*  
615 *<http://sites.google.com/site/avicolprogram/> (2011).*
- 616 58. R Development Core Team, *R: a language and environment for statistical computing* (R  
617 Foundation for Statistical Computing, 2013).
- 618 59. J. Pinheiro, D. Bates, D. DebRoy, D. R. Sarkar, nlme: linear and nonlinear mixed effects models.  
619 R package version 3.1-145 (2020).
- 620 60. T. Guillerme, K. Healy, mulTree: performs MCMCglmm on multiple phylogenetic trees. R  
621 package version 1.3.6. (2019).
- 622 61. J. D. Hadfield, MCMC methods for multi-response generalized linear mixed models: The  
623 MCMCglmm R Package. *J Stat Soft* **33** (2010).
- 624 62. A. B. D. Cassie, S. Baxter, Wettability of porous surfaces. *Transactions of the Faraday Society* **40**,  
625 546 (1944).
- 626 63. E. P. Ivanova, *et al.*, Molecular Organization of the Nanoscale Surface Structures of the  
627 Dragonfly *Hemianax papuensis* Wing Epicuticle. *PLOS ONE* **8**, e67893 (2013).
- 628 64. A. J. B. Milne, A. Amirfazli, The Cassie equation: How it is meant to be used. *Advances in Colloid*  
629 *and Interface Science* **170**, 48–55 (2012).
- 630  
631  
632

633

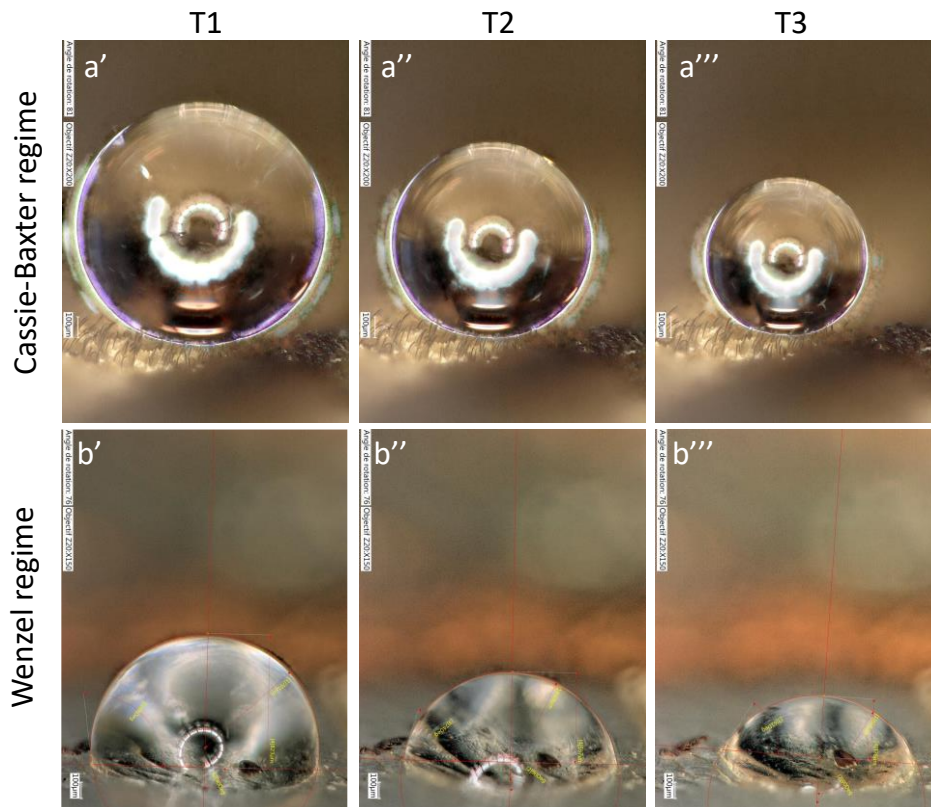

634

635

636 **Figure 1.** Examples of water droplets dropped in the transparent zone: Cassie-Baxter regime (series a)

637 for *Eutesis hypereia* combining erected coloured piliform and lamellar scales and Wenzel regime

638 (series b) for *Neorcarnegia basirei* with a nude membrane. Water droplet evolution is shown at

639 different times: T1 (a', b'), T2 (a'', b''), and at T3 (a''', b''').

640

641

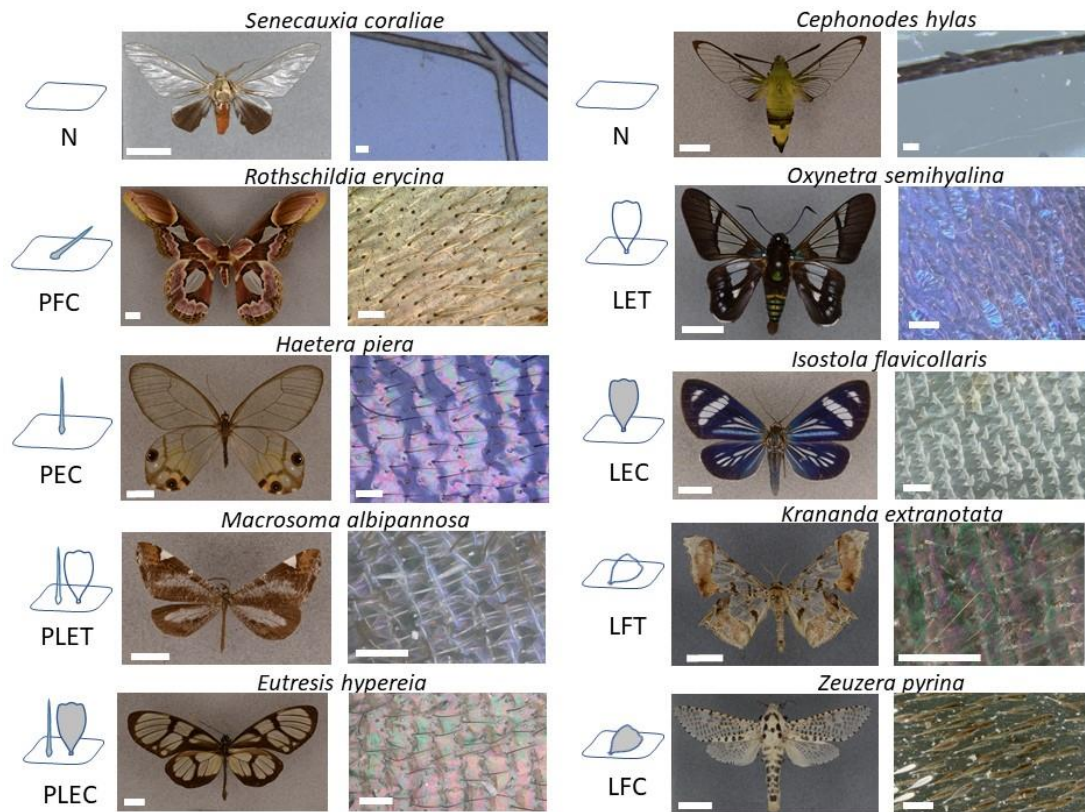

642  
 643 **Figure 2.** Examples of structural strategies in clearwing butterflies. Structural strategy is a combination  
 644 of scale type (N: no scales, P: piliform scales, L: lamellar scales, PL: combination of piliform scales and  
 645 lamellar scales), scale insertion (E: erected, and F: flat), and scale colour (C: coloured, and T:  
 646 transparent). Notice that *Macrosoma albipannosa* has transparent lamellar scales but coloured  
 647 piliform scales.

648  
 649  
 650  
 651

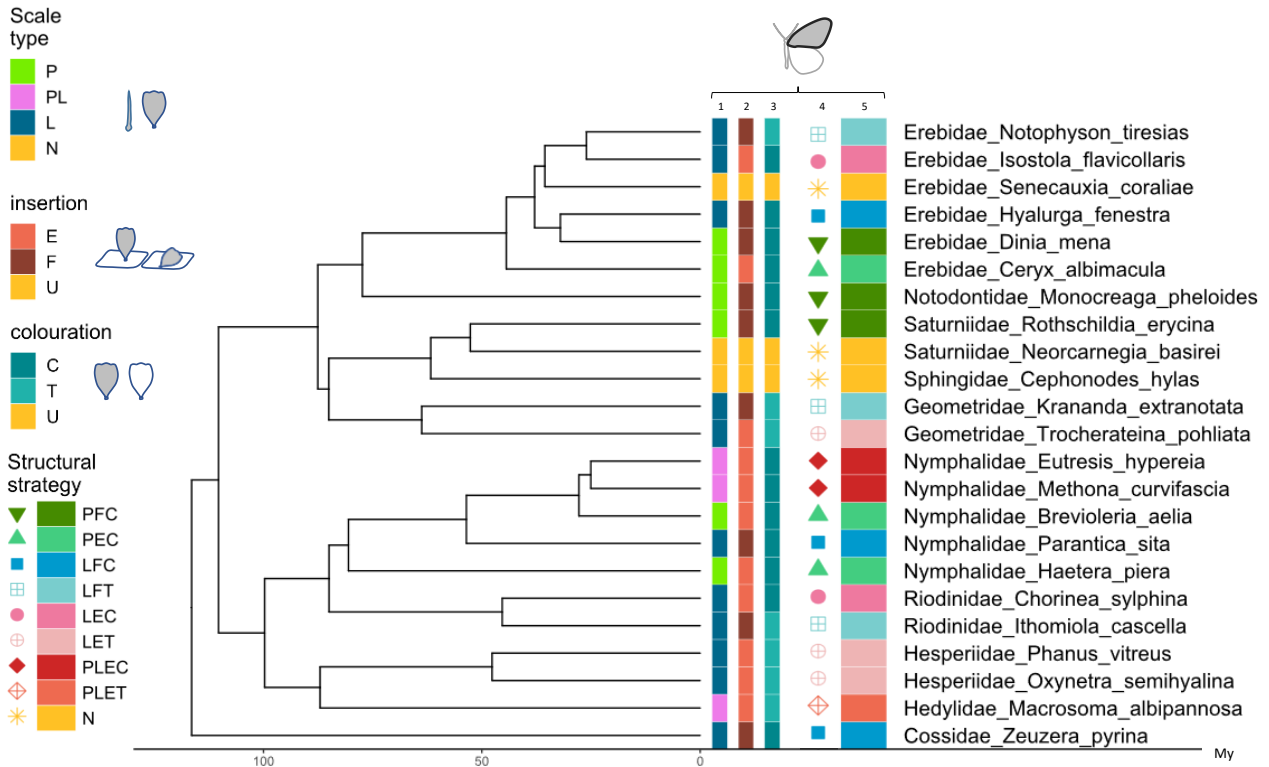

652  
653  
654  
655  
656  
657  
658  
659  
660  
661  
662  
663  
664

**Figure 3.** Phylogeny and distribution of trait values in the study species, for the forewing. Scale type (column 1), scale insertion on the membrane (column 2), scale colouration (column 3), and structural strategy (columns 4 and 5). For scale type: N=no scales, P=piliform scales, L= lamellar scales PL=combination of piliform scales and lamellar scales. For scale insertion on the membrane: E=erected, F=flat, U=undefined (for absent scales). For scale colouration: C=coloured, T=transparent, U=undefined (for absent scales). The strategy NUU was simplified into N.

665  
666  
667

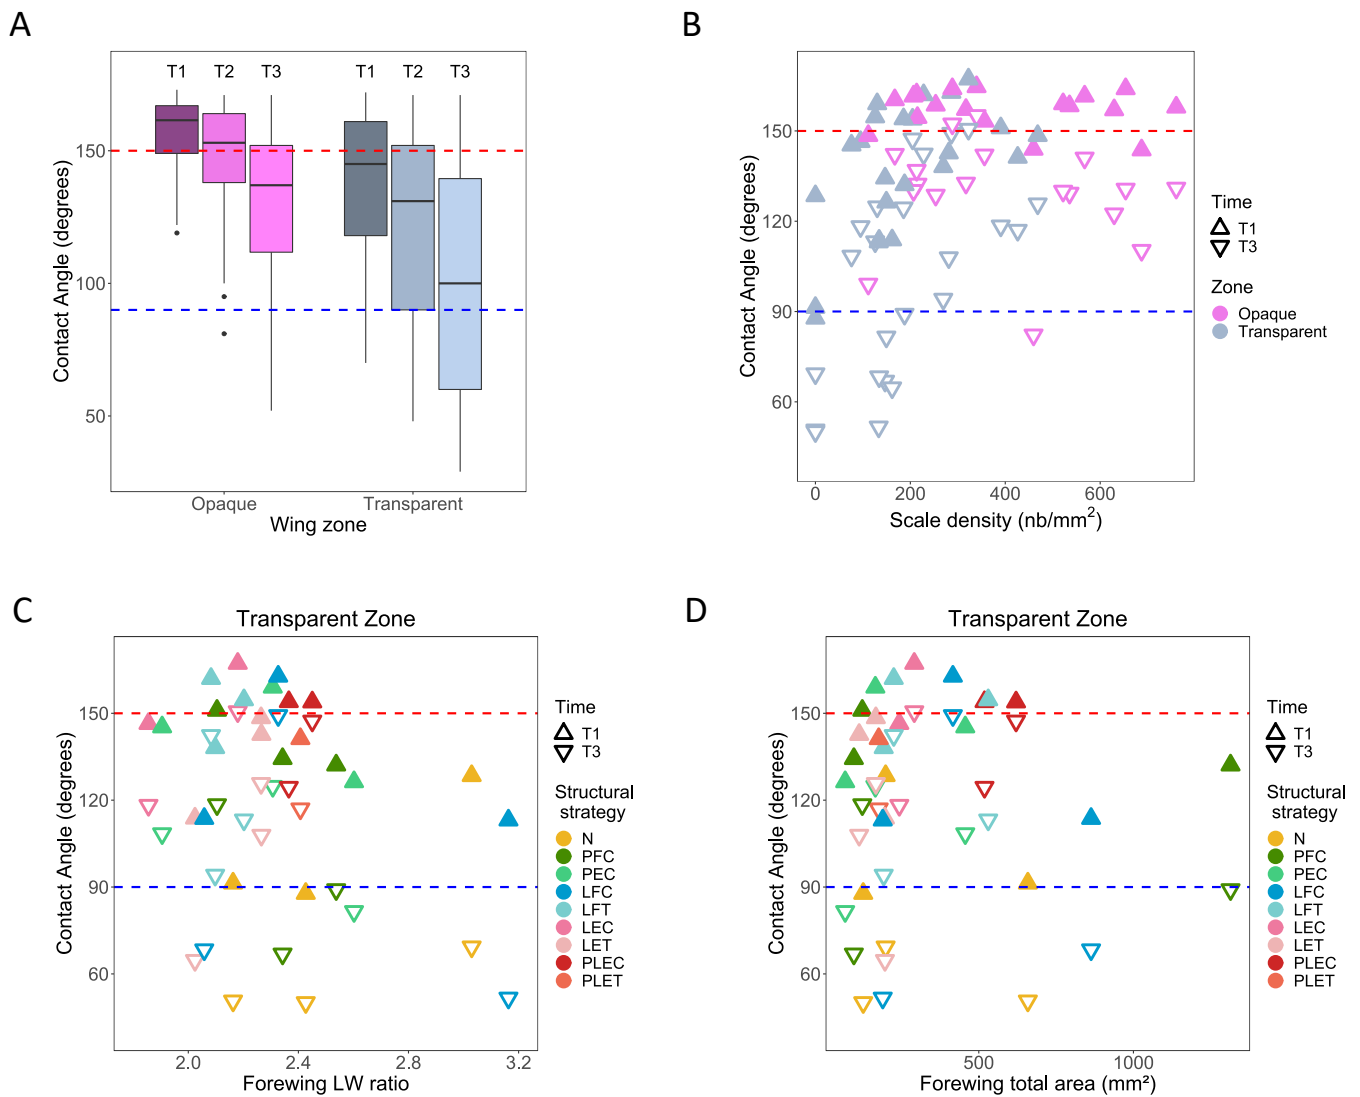

668  
669

670 **Figure 4.** Variation in contact angle with evaporation time(A) and with scale density (B) in the  
671 transparent and opaque zones. Variation in contact angle with forewing length-to-width ratio (C) and  
672 total area (D) in the transparent zone. Structural strategy is a combination of scale type (N: no scales,  
673 P: piliform scales, L: lamellar scales, PL: combination of piliform scales and lamellar scales), scale  
674 insertion (E: erected, and F: flat), and scale colour (C: coloured, and T: transparent). Superhydrophobic:  
675 >150° (above the red line), hydrophobic: <150° and >90°; hydrophilic: <90° (below the blue line). (A)  
676 all measurements considered, (BCD) mean CA values for each species, zone, and time. Results are  
677 presented in Tables S1 to S3d.

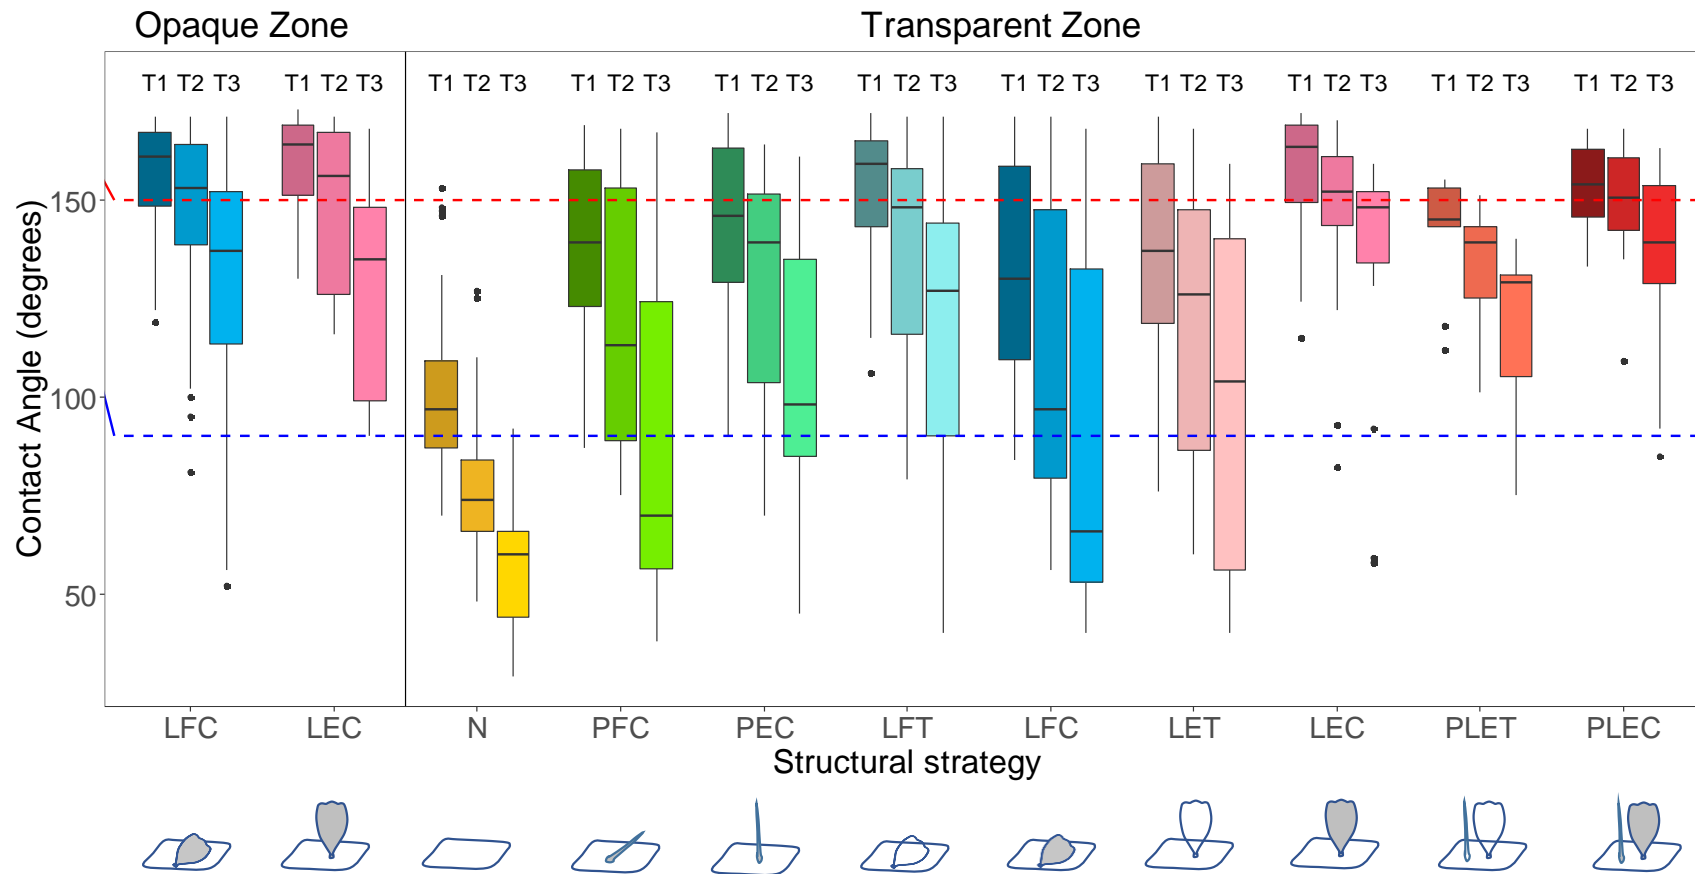

**Figure 5.** Variations of contact angle with wing zone, microstructure and time, i.e. water droplet size. Structural strategy is a combination of scale type (N: no scales, P: piliform scales, L: lamellar scales, PL: combination of piliform scales and lamellar scales), scale insertion (E: erected, and F: flat), and scale colour (C: coloured, and T: transparent). Superhydrophobic:  $>150^\circ$  (above the red line), hydrophobic:  $<150^\circ$  and  $>90^\circ$ ; hydrophilic:  $<90^\circ$  (below the blue line). All individuals and droplets were considered. Results are presented in Tables S2 to S3d.

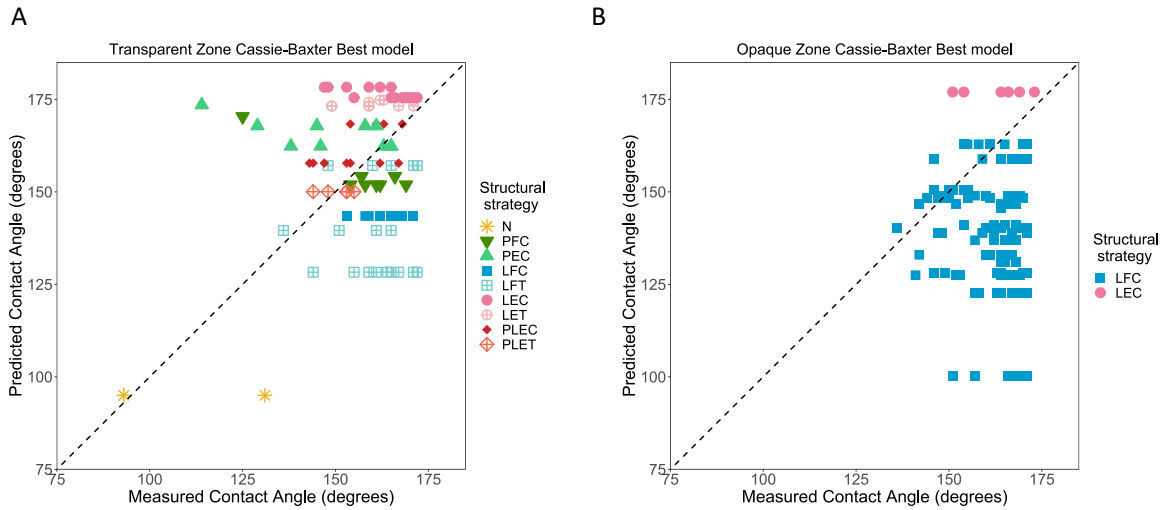

1

2

3 **Figure 6.** Comparison between contact angle values predicted by the best Cassie-Baxter model  
 4 for the transparent zone (A) and the opaque zone (B). For the measured values, we included all  
 5 the values from water droplets characterized as following a Cassie-Baxter regime, i.e. showing a  
 6 CA > 120° at T3. The best model considered the effect of microstructures for all structural strategies  
 7 (with bending P scales when erect) and an effect of nanostructures, but only for flat lamellar scales  
 8 in high coverage. Structural strategy is a combination of scale type (N: no scales, P: piliform scales,  
 9 L: lamellar scales, PL: combination of piliform scales and lamellar scales), scale insertion (E: erect,  
 10 and F: flat), and scale colour (C: coloured, and T: transparent). The dashed black line represents  
 11 perfect agreement between prediction and measurement. We considered all the measured water  
 12 droplets, and for time T1.

13



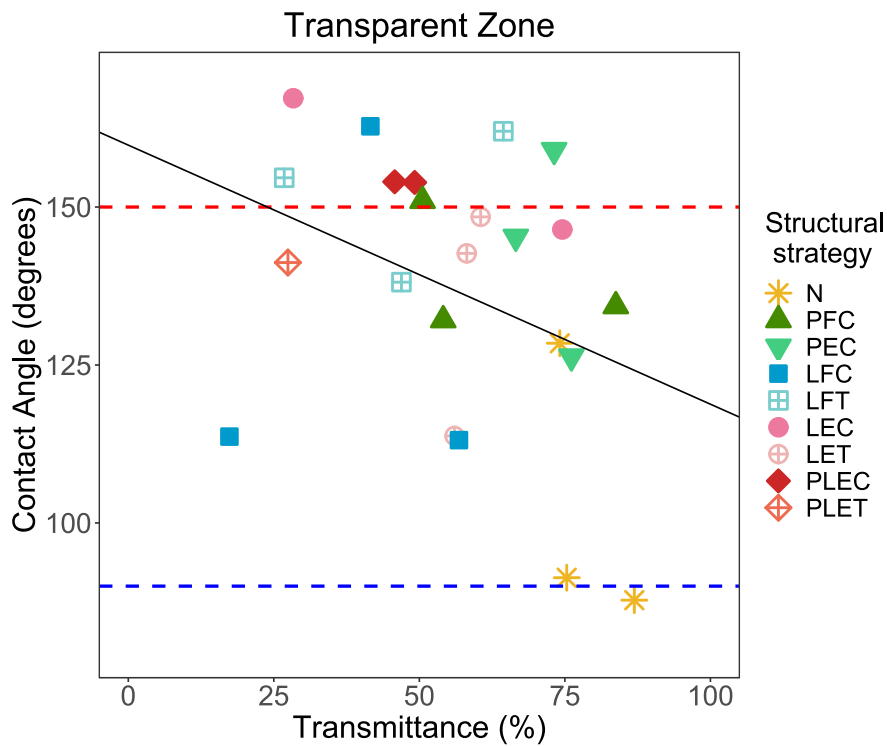

14

15

16 **Figure 7.** Variations of contact angle with wing transmittance for the different structural  
 17 strategies. Structural strategy is a combination of scale type (N: no scales, P: piliform scales, L:  
 18 lamellar scales, PL: combination of piliform scales and lamellar scales), scale insertion (E: erected,  
 19 and F: flat), and scale colour (C: coloured, and T: transparent). Superhydrophobic:  $>150^\circ$  (above  
 20 the red line), hydrophobic:  $<150^\circ$  and  $>90^\circ$ ; hydrophilic:  $<90^\circ$  (below the blue line). We considered  
 21 only the mean of CA for each species, for time T1, and for the transparent zone. The black plain  
 22 line indicates the significant fitted regression line based on the Bayesian model. Results are  
 23 presented in Table S5.

24

25

26

A

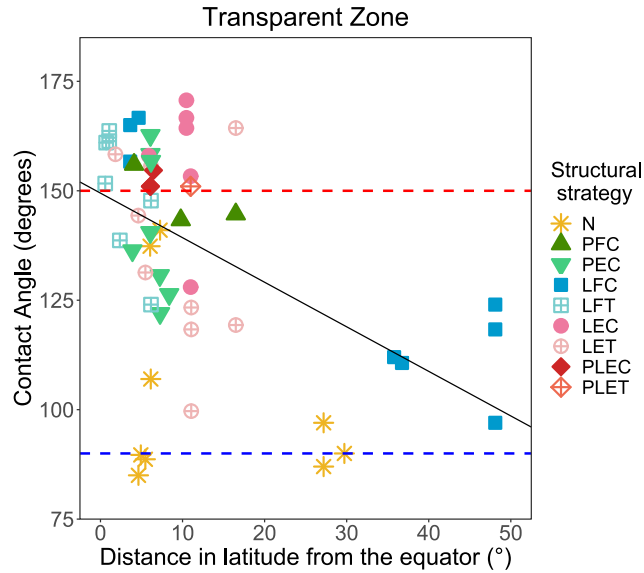

B

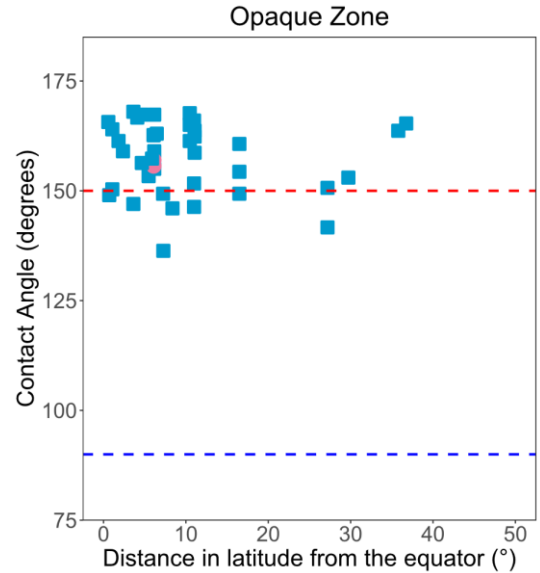

27

28 **Figure 8.** Relationship between contact angle in the transparent (A) and in the opaque (B) zone  
 29 and the distance in latitude to the equator. Structural strategy is a combination of scale type (N:  
 30 no scales, P: piliform scales, L: lamellar scales, PL: combination of piliform scales and lamellar  
 31 scales), scale insertion (E: erected, and F: flat), and scale colour (C: coloured, and T: transparent).  
 32 Superhydrophobic:  $>150^\circ$  (above the red line), hydrophobic:  $<150^\circ$  and  $>90^\circ$ ; hydrophilic:  $<90^\circ$   
 33 (below the blue line). The black plain line in A indicates the significant fitted regression line based  
 34 on the Bayesian model. Results are presented in Table S6.
